# Supplementary material for: Whole Aegilops tauschii transcriptome investigation revealed nine novel miRNAs involved in stress response
Source: bioRxiv or medRxiv preprint supplement (doi:10.1101/525972), 2019-01-21
Supplement: Supplementary file [file media-1.pdf]

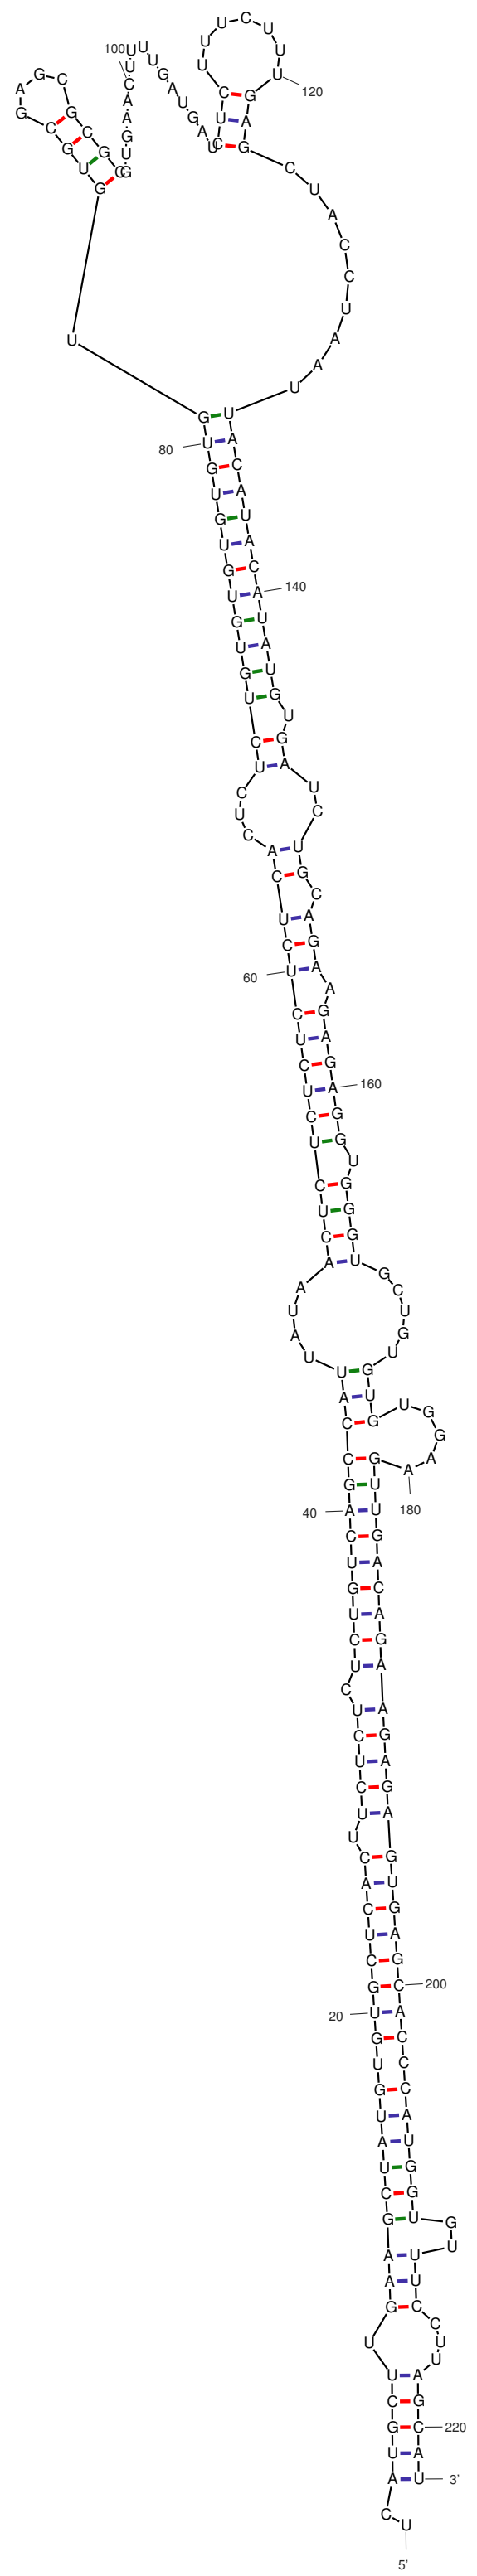

$dG = -76.09$  [Initially -80.00] *ata-miRNovel\_1*

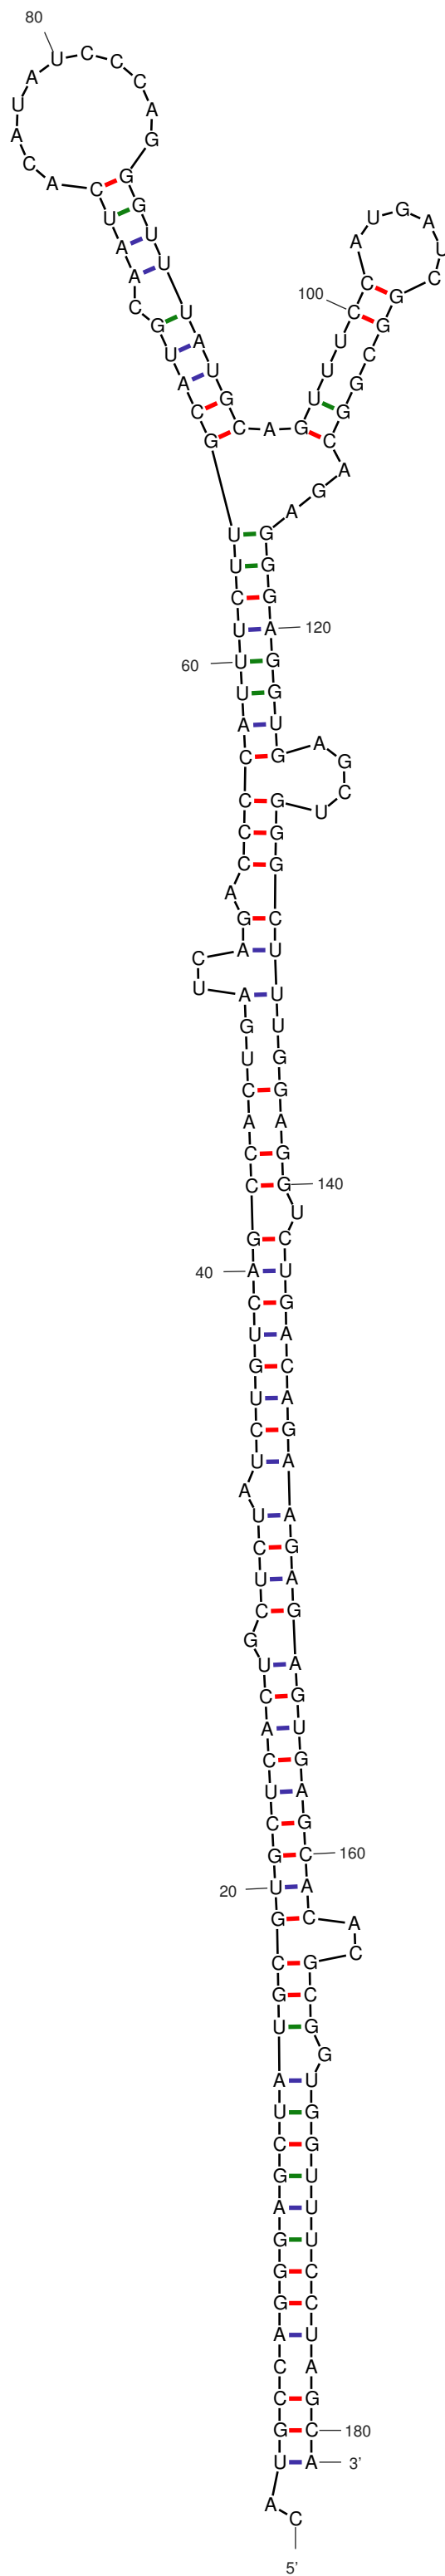

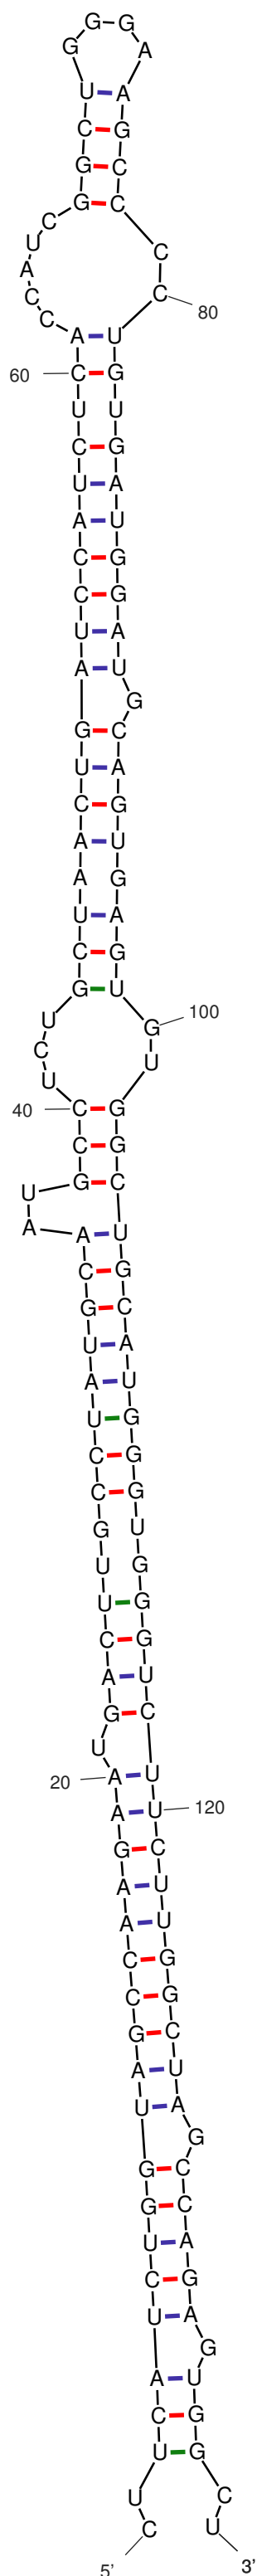

$dG = -75.90$  [Initially  $-75.90$ ] *ata-miRNovel\_3*

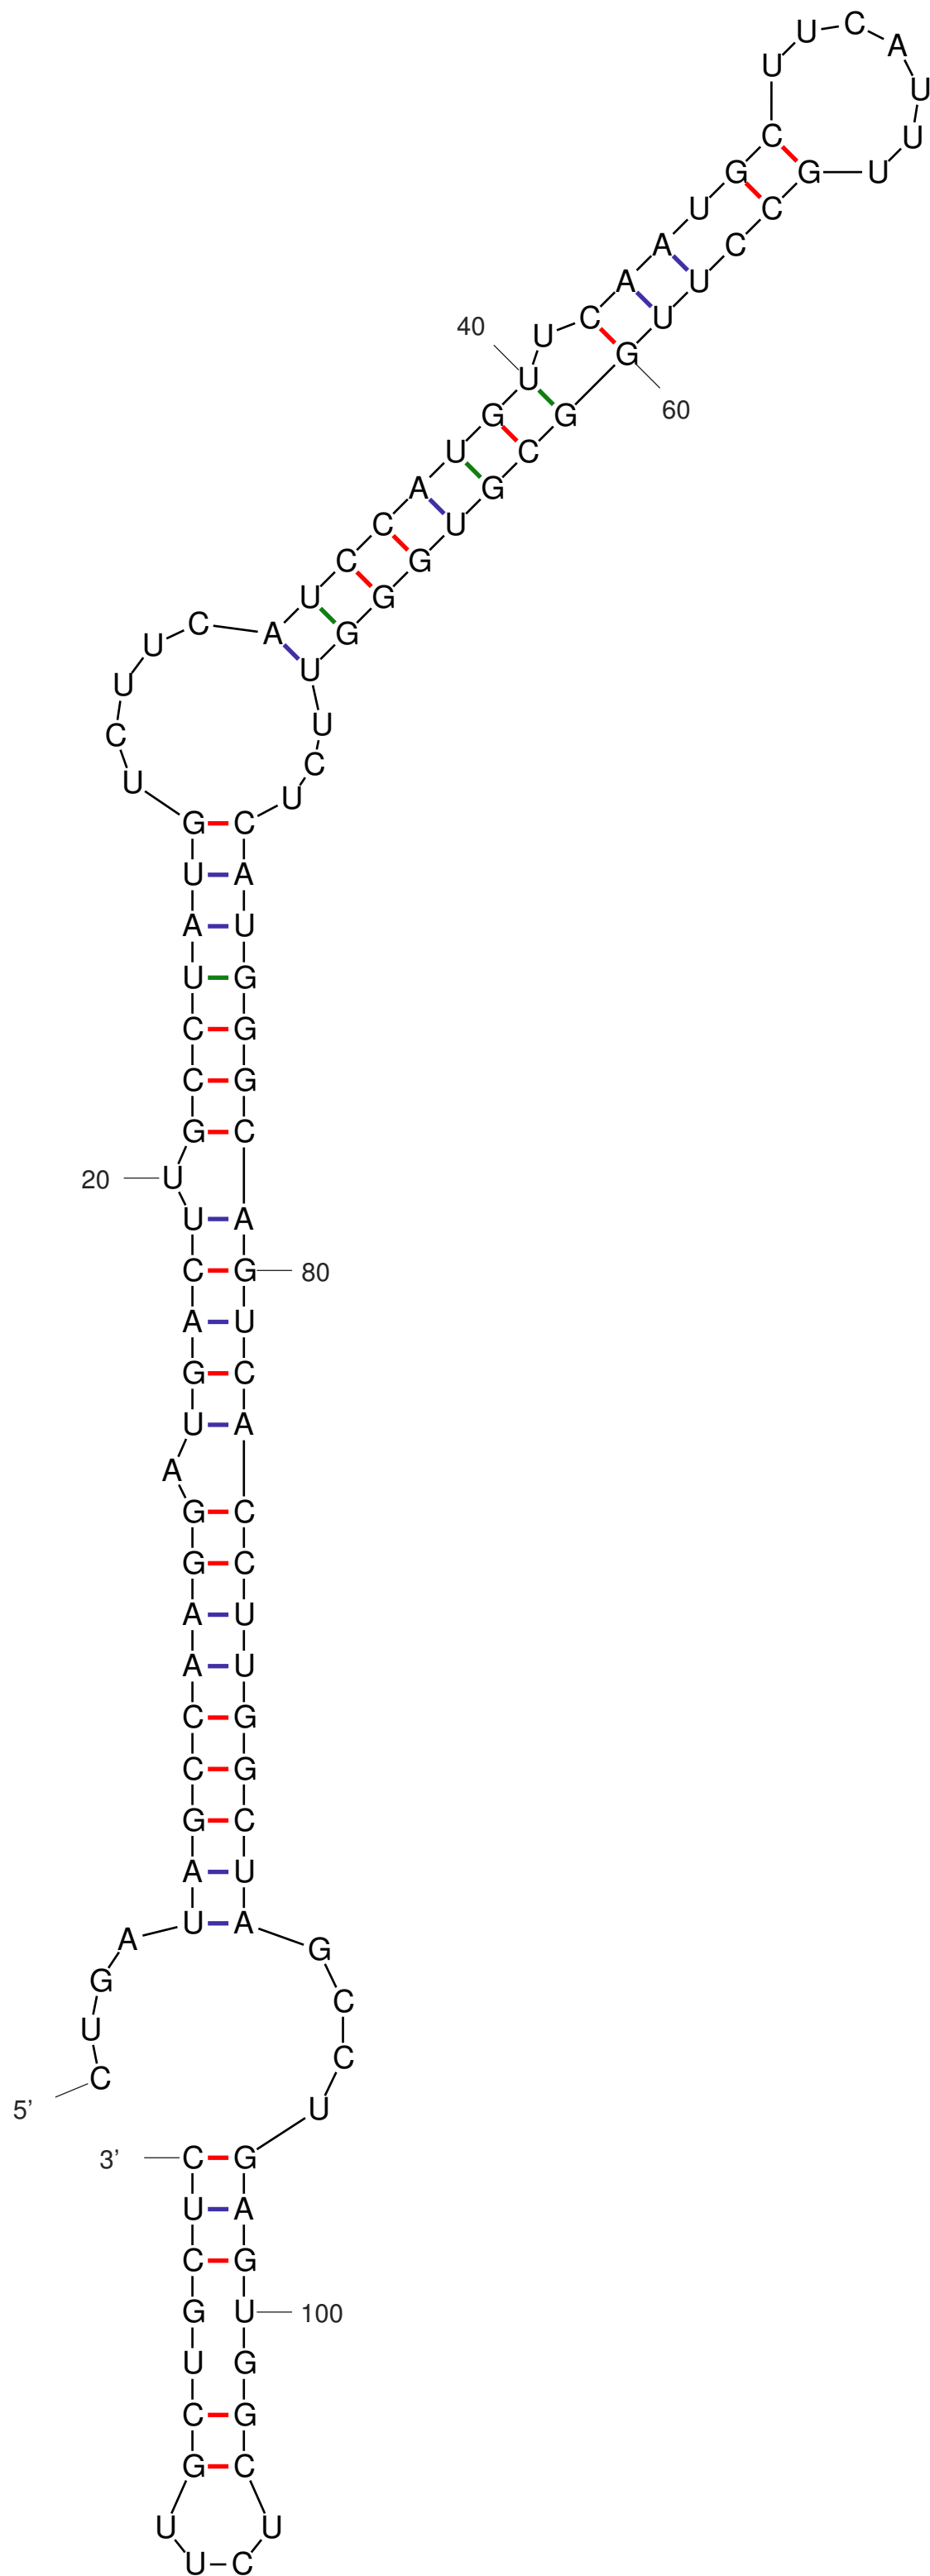

*dG = -55.70 [Initially -55.70] ata-miRNovel\_4*

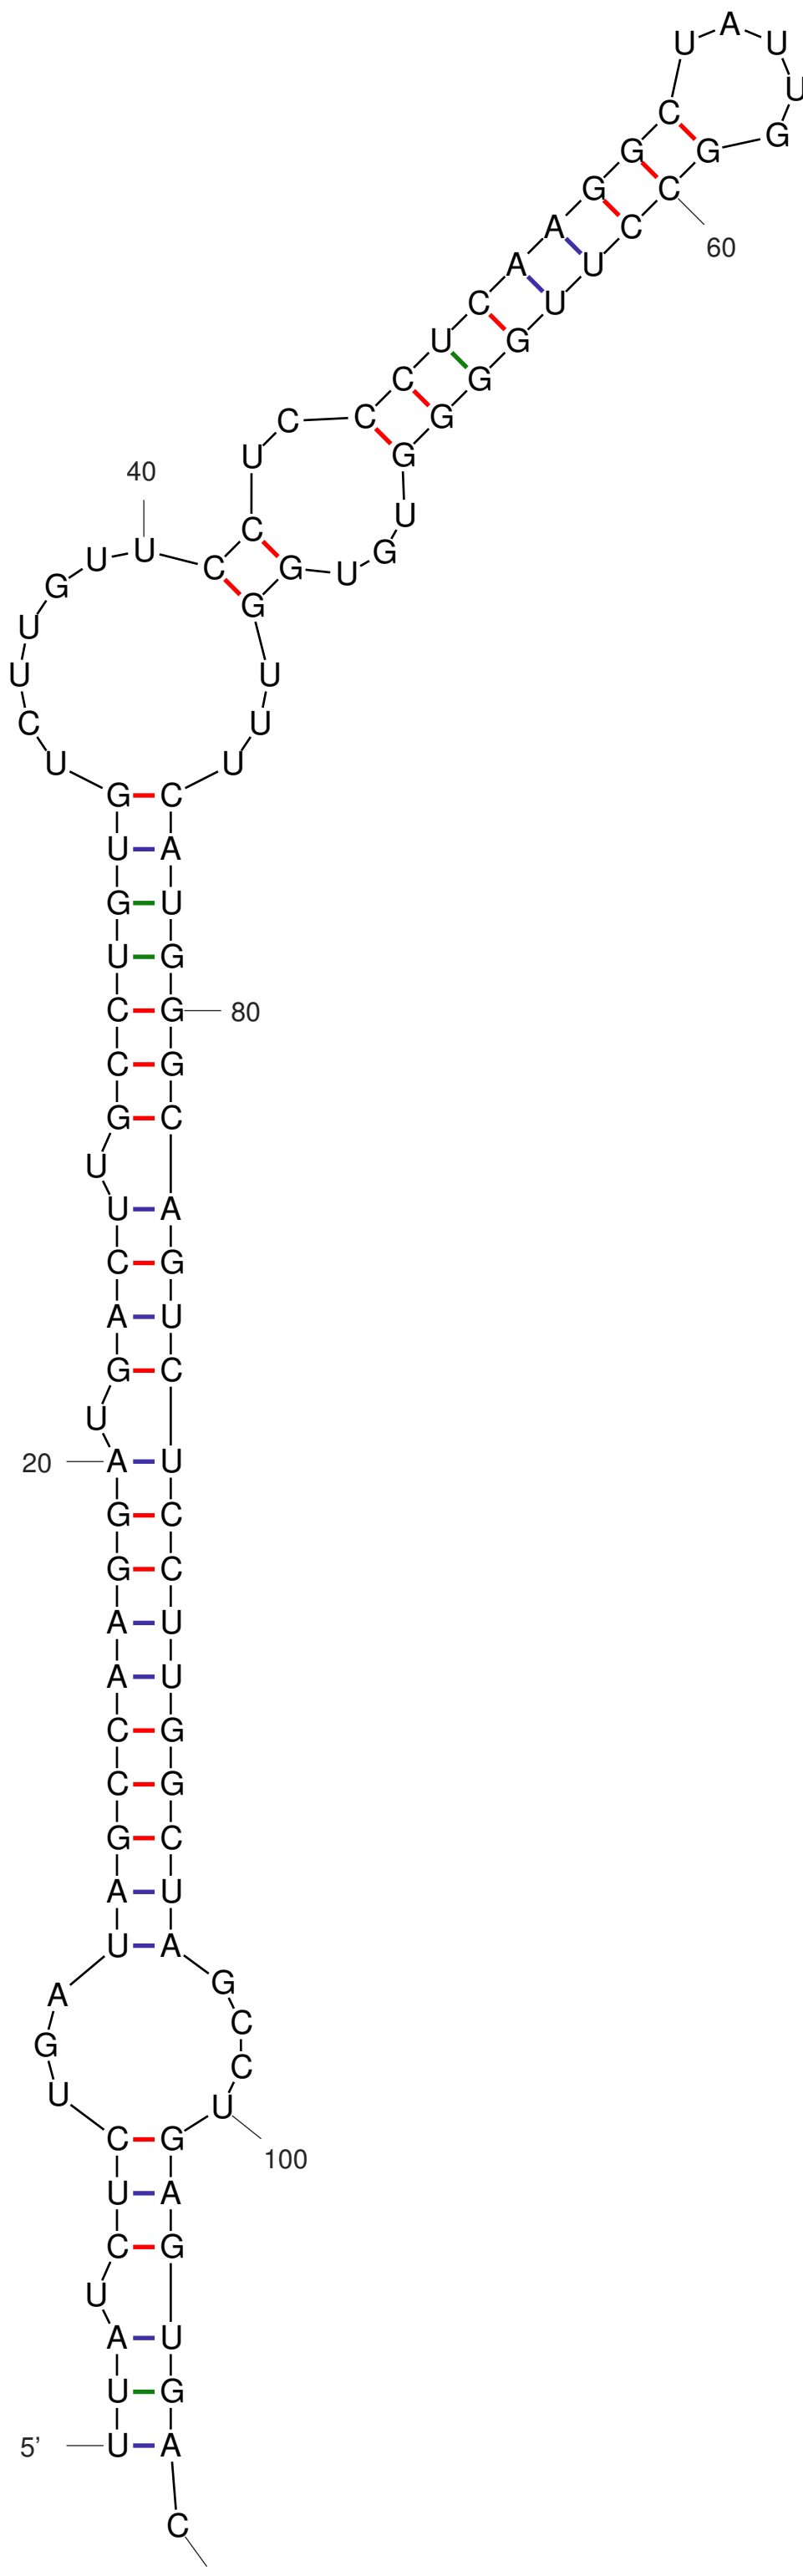

$dG = -53.30$  [Initially -53.30] *ata-miRNovel\_5*

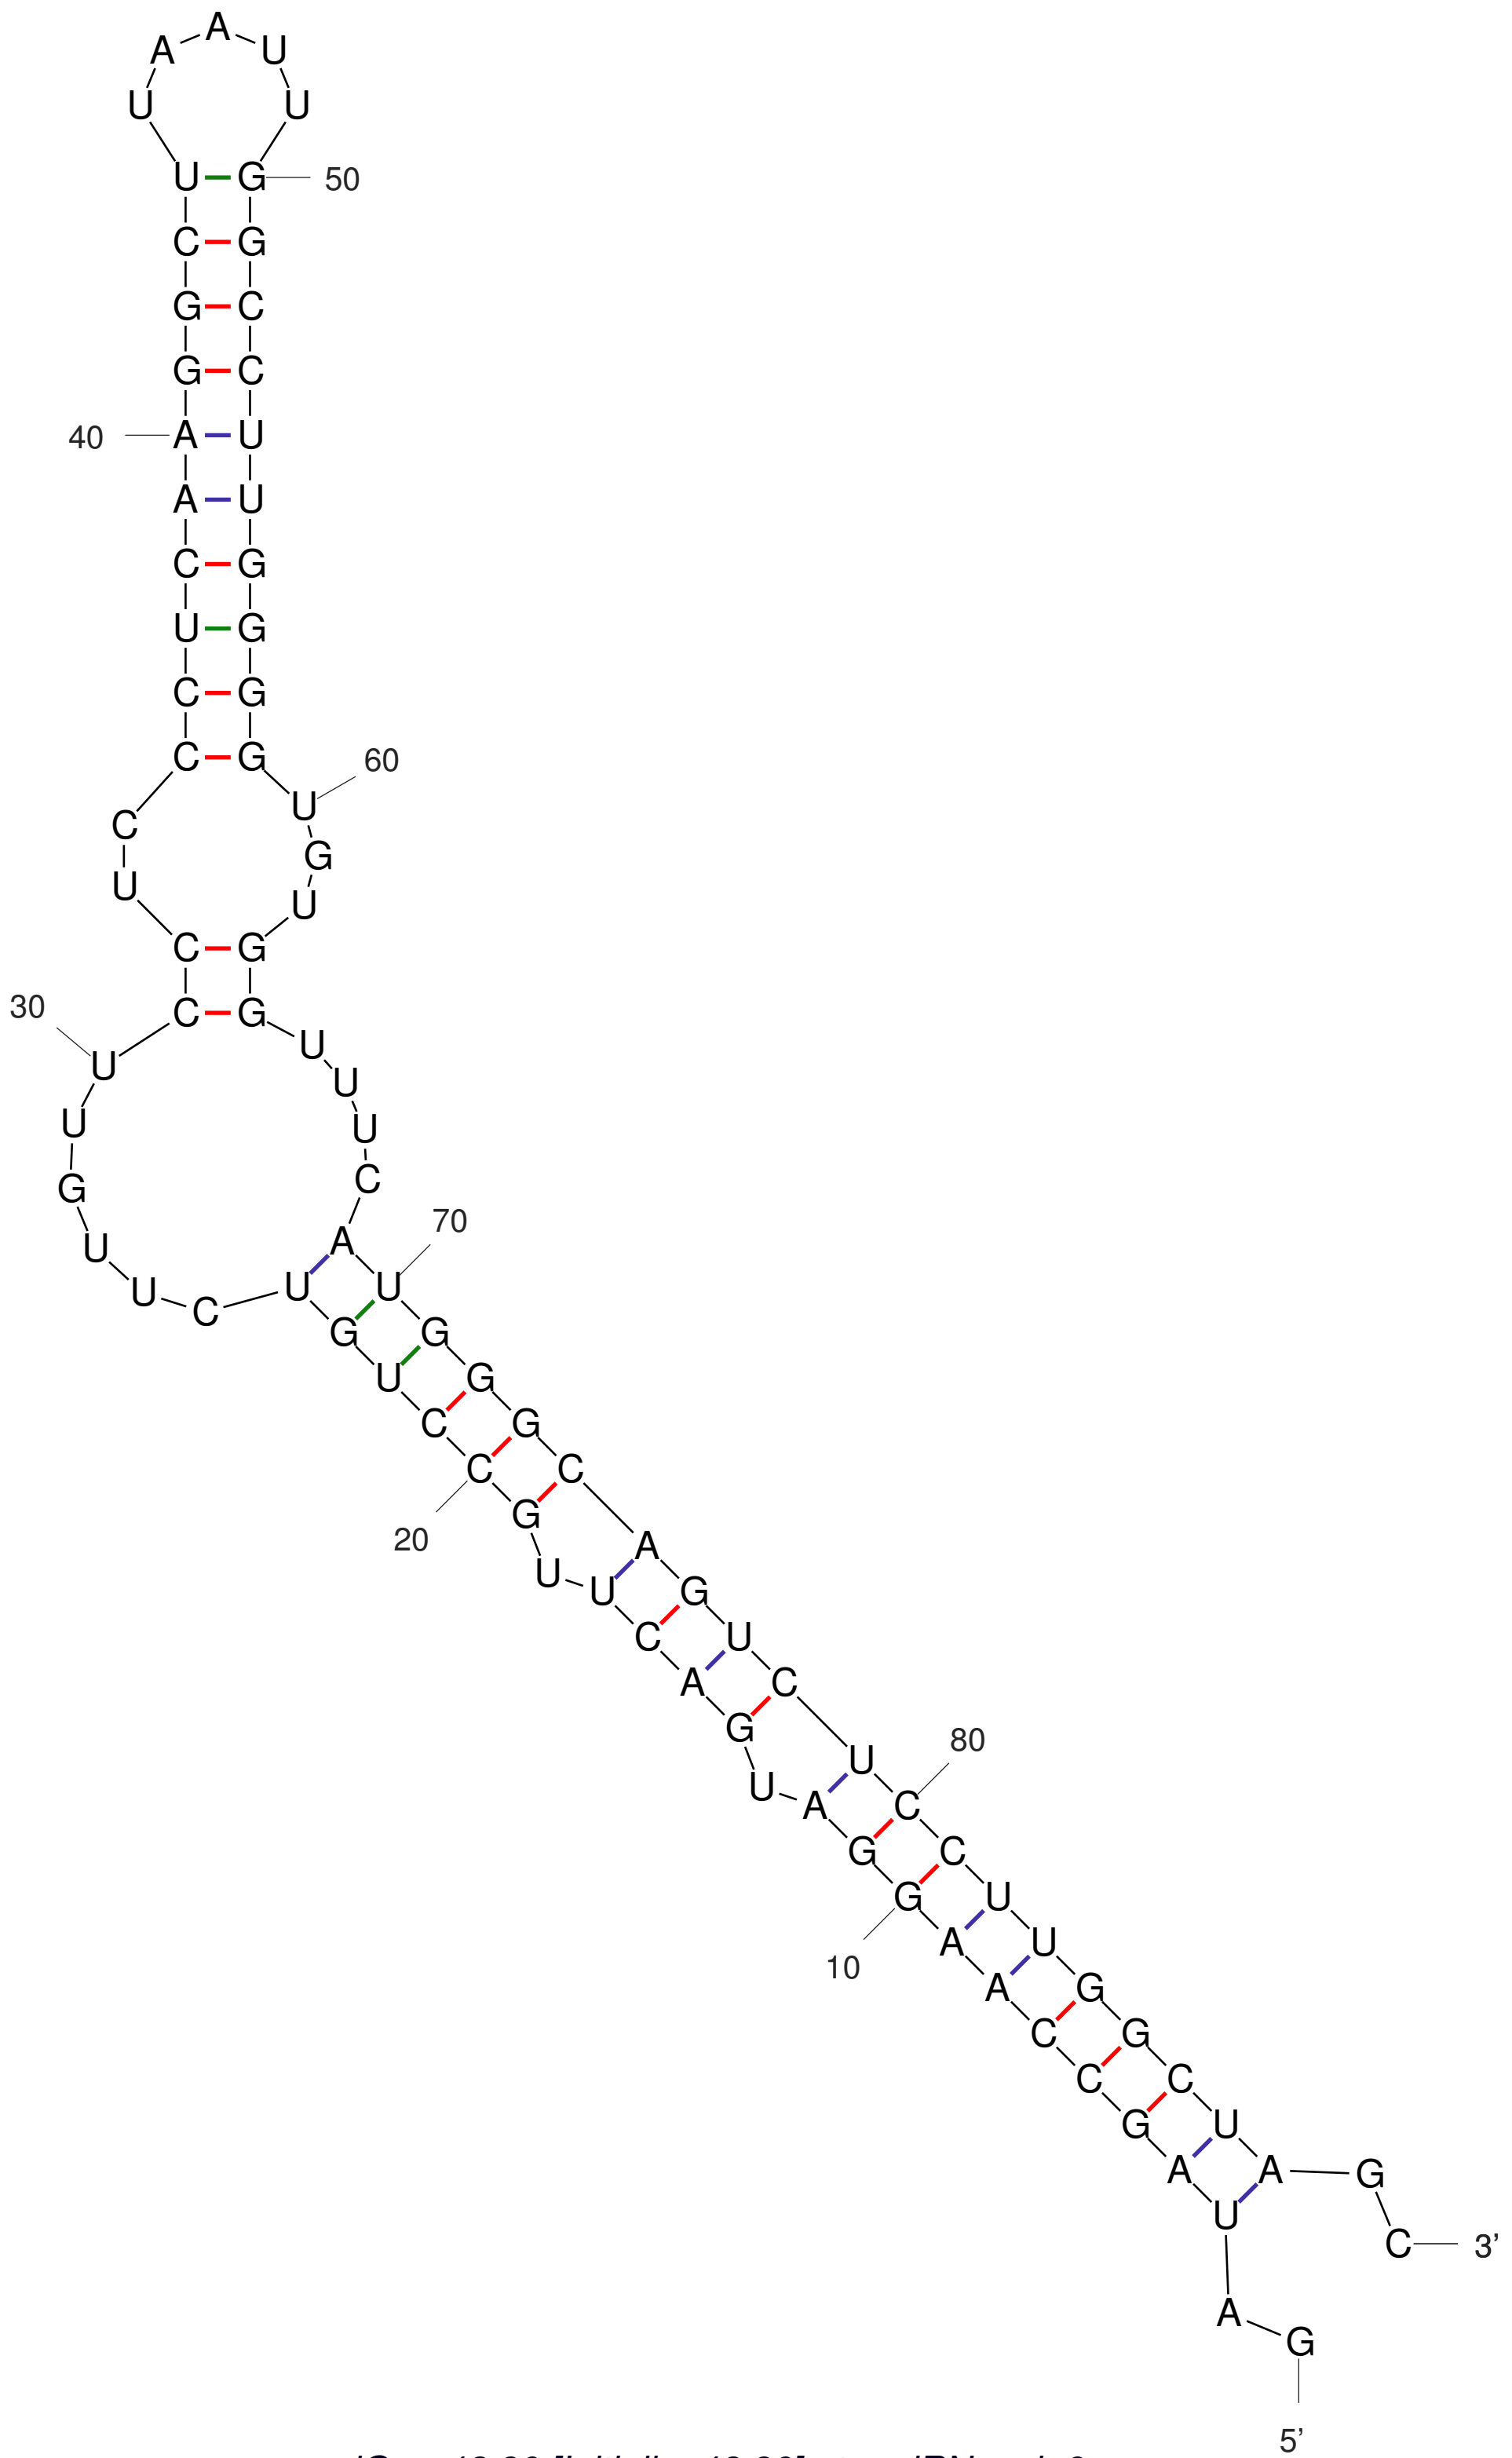

*dG = -48.90 [Initially -48.90] ata-miRNovel\_6*

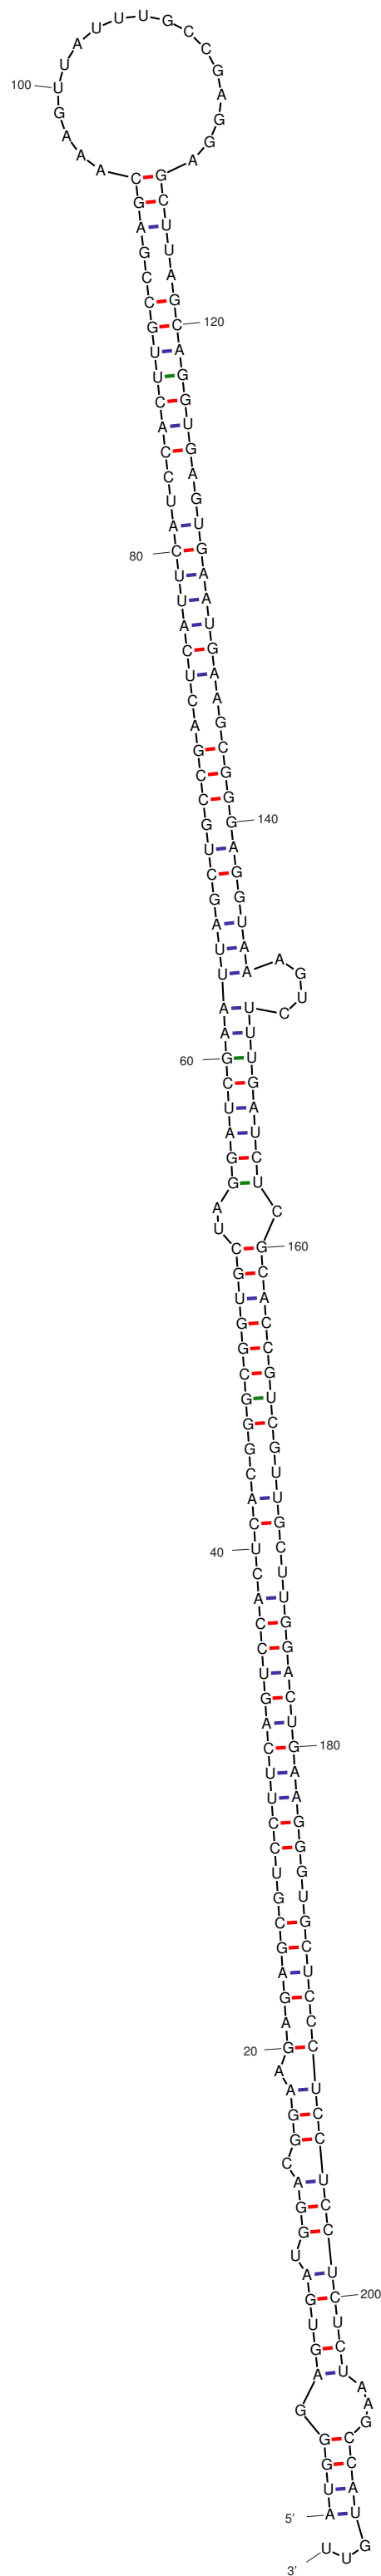

$dG = -103.10$  [Initially -103.10] *ata-miRNovel\_7*

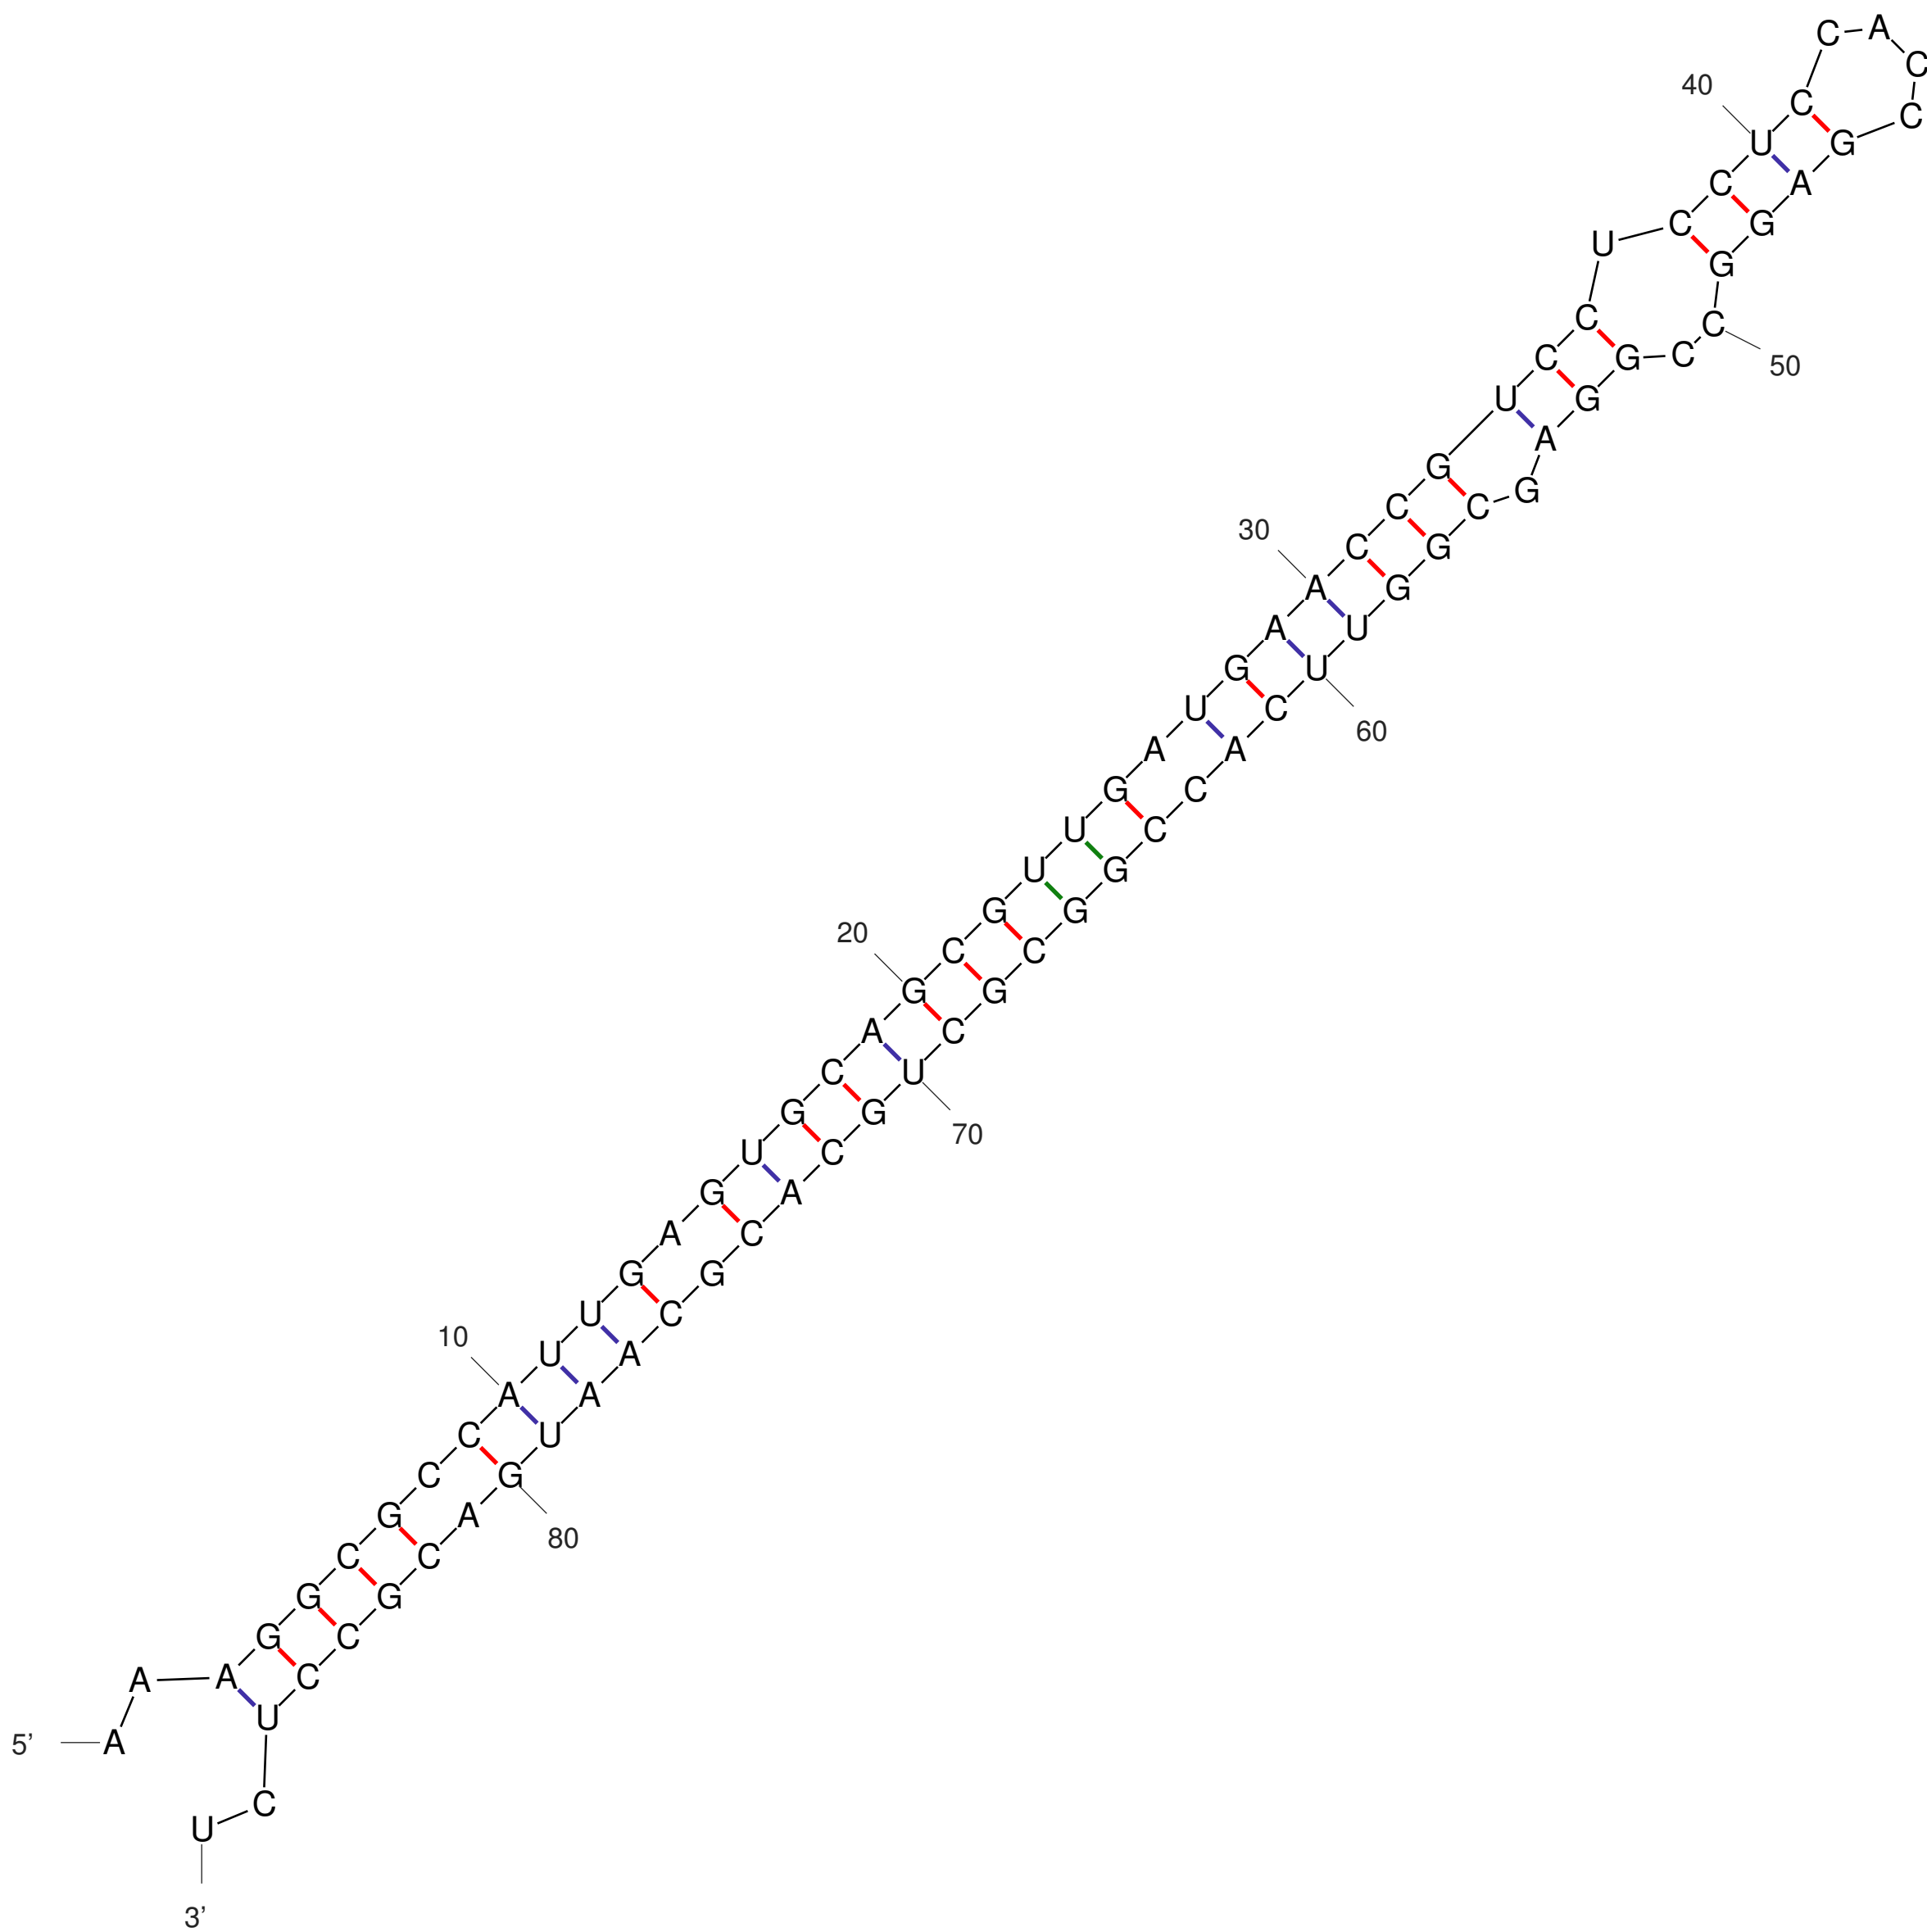

*dG = -56.30 [Initially -56.30] ata-miRNovel\_8*



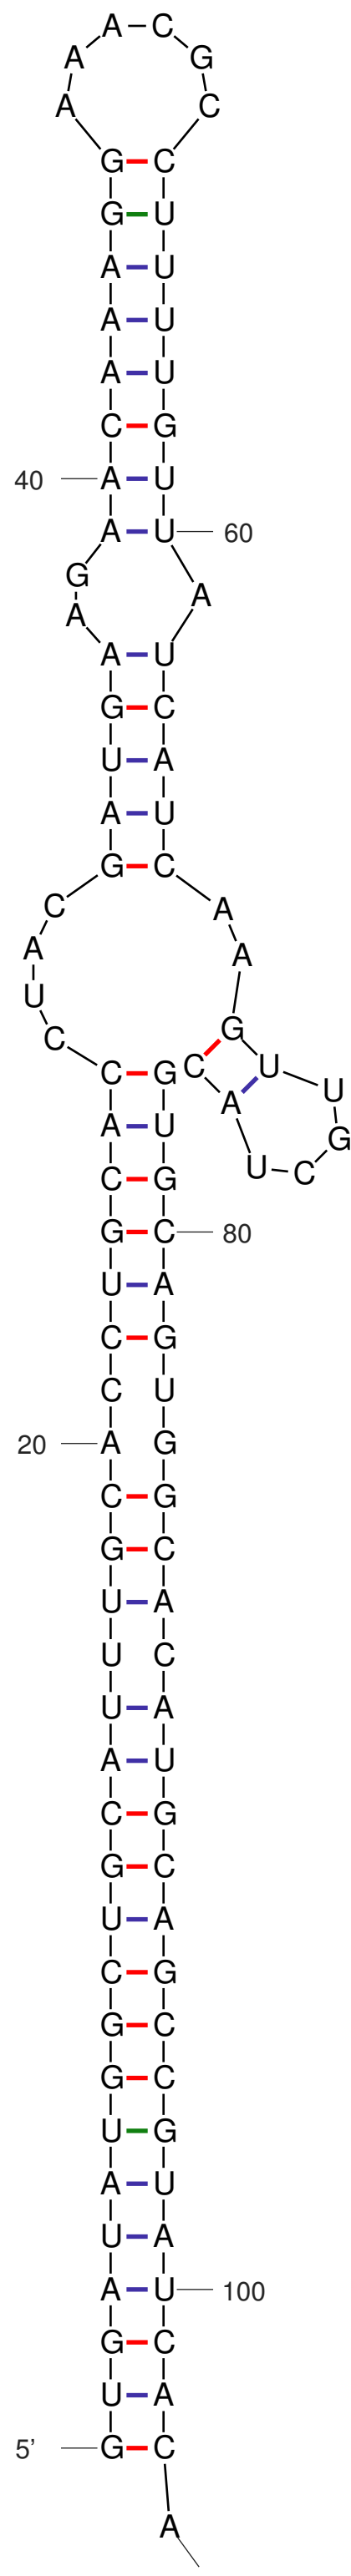

$dG = -51.40$  [Initially -53.10] *ata-miRNovel\_9*
